# Supplementary material for: Neuroimmune activation is associated with neurological outcome in anoxic and traumatic coma
Source: PubMed Central journal article supplement (PMC10994537; doi:10.1093/brain/awae045), 2024-02-27
Supplement: awae045_supplementary_data.pdf [file awae045_supplementary_data.pdf]

## Supplementary Material

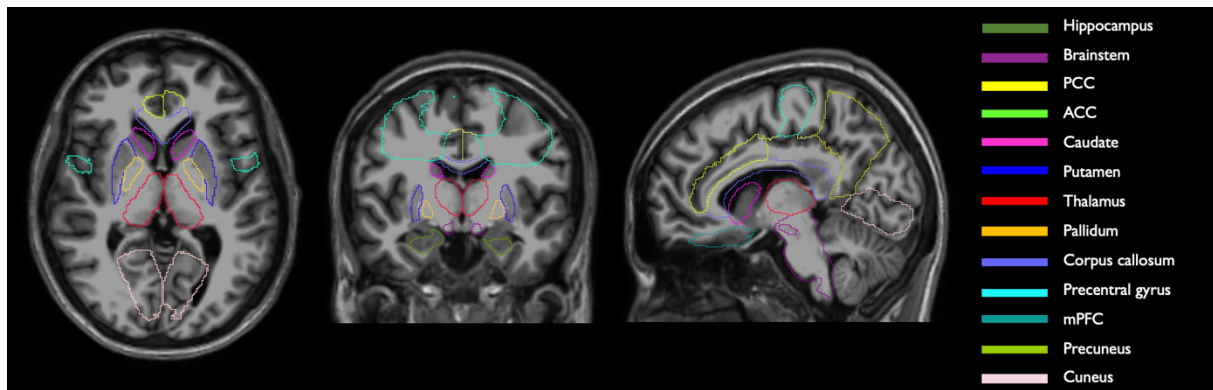

**Fig.S1. Volumes of interest definition.** Volumes Of Interest (VOI) from Hammers individual adult brain atlas<sup>1,2</sup>. Source [www.brain-development.org](http://www.brain-development.org). Abbreviations: PCC = posterior cingulate cortex; ACC = anterior cingulate cortex; mPFC = median prefrontal cortex.

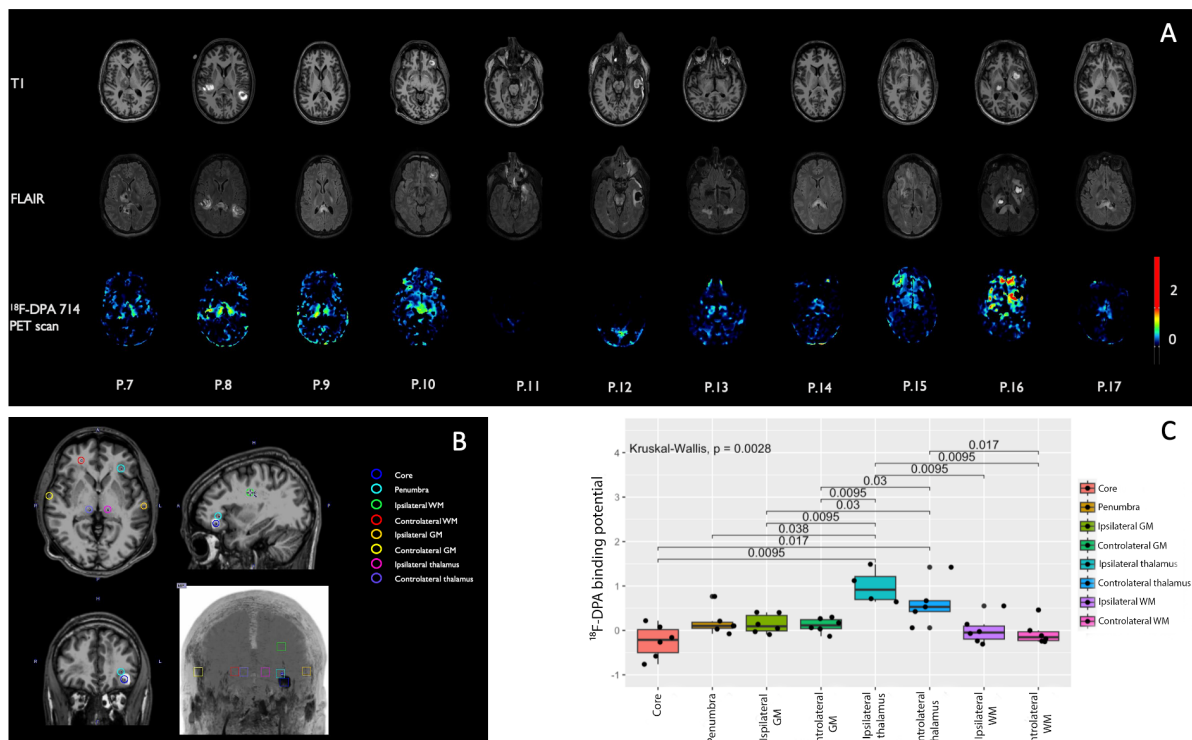

**Fig.S2. Focal lesion assessment.** A. T1, FLAIR and <sup>18</sup>F-DPA 714 PET scan data from the eleven traumatic brain injured patients with coma. B. Spheric volume of interest (VOI) of radius = 0.5 mm were used to probe TSPO levels within contusion core and penumbra and the ipsilateral and contralateral white matter (WM), grey matter (GM) and thalami. Illustration from patient 10. C. Mean values of <sup>18</sup>F-DPA 714 PET within the pre-defined VOI.

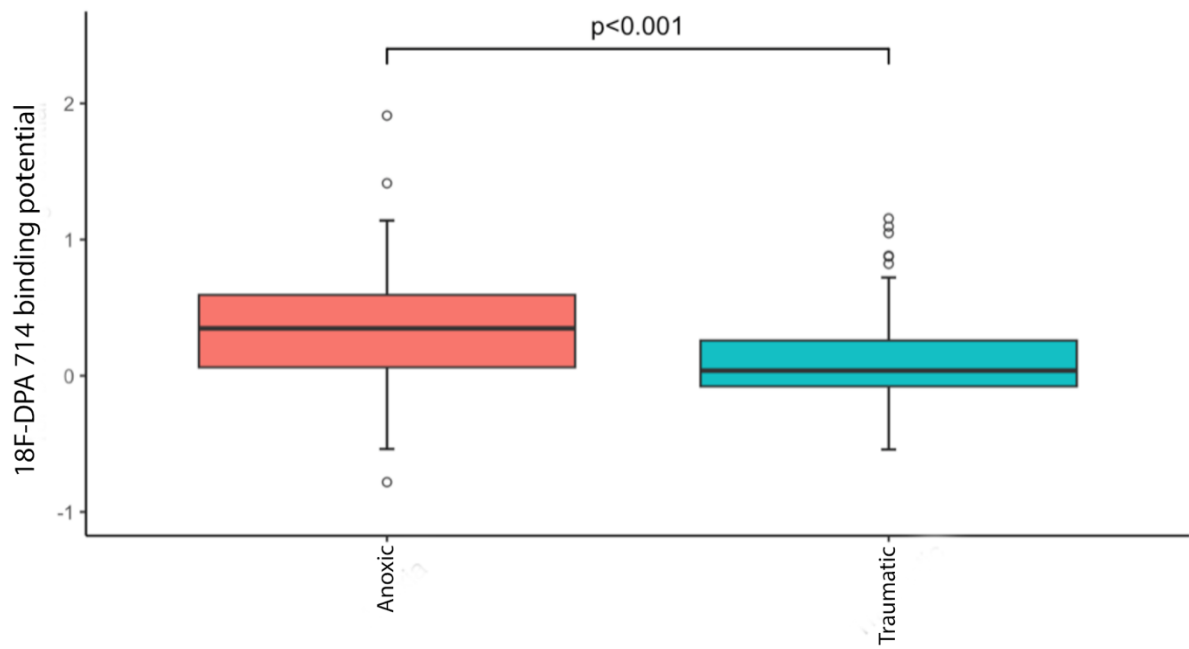

**Fig.S3. Whole brain TSPO levels according to primary brain injury mechanism.**

#### References

1. S. Gousias *et al.*, Automatic segmentation of brain MRIs of 2-year-olds into 83 regions of interest. *Neuroimage* **40**, 672-684 (2008).
2. A. Hammers *et al.*, Three-dimensional maximum probability atlas of the human brain, with particular reference to the temporal lobe. *Hum Brain Mapp* **19**, 224-247 (2003).

**Anoxic patient's demographic and clinical data**

| Patient | Age | Sex | BI     | Mechanism             | Delay (BI to inclusion, days) | Medication (PET Day)     | CRS-r subscale     |
|---------|-----|-----|--------|-----------------------|-------------------------------|--------------------------|--------------------|
| P.1     | 18  | F   | Anoxic | CA / Drowning         | 30                            | Valproate, Ertapenem     | A1 V0 M2 O0 C0 Ar0 |
| P.2     | 65  | F   | Anoxic | CA / Hypoxia          | 30                            | None                     | A3 V4 M4 O2 C1 Ar3 |
| P.3     | 59  | M   | Anoxic | CA / Epilepsy         | 8                             | Levetiracetam, Urapidil, | A1 V1 M1 O1 C0 Ar1 |
| P.4     | 59  | M   | Anoxic | CA / Hypoxia          | 9                             | Furosemide, SA,          | NA                 |
| P.5     | 30  | F   | Anoxic | CA / Cardiac ischemia | 8                             | Levetiracetam, Valproate | A1 V0 M2 O0 C0 Ar1 |
| P.6     | 23  | M   | Anoxic | CA / Commotio cordis  | 10                            | AC                       | A4 V5 M6 O2 C1 Ar3 |

**Tab S1.** The CRS-R encompass six subscales: A= Auditory;V= Visual; M. Motor; O= Oromotor; C= Communication. Ar=Arousal Functions. Abbreviations: AC= amoxicillin-clavulanate; BI= Brain injury; CA= Cardiac arrest; SA= salicylic acid.

**Traumatic patient's demographic and clinical data**

| Patient | Age | Sex | BI  | Mechanism   | Extracranial traumatic injury           | Delay (BI to inclusion, | Medication (PET Day)      | CRS-r subscale     |
|---------|-----|-----|-----|-------------|-----------------------------------------|-------------------------|---------------------------|--------------------|
| P.7     | 39  | F   | TBI | NP; MVRI    | None                                    | 4                       | SA, Morphine              | A1 V1 M2 O1 C0 Ar2 |
| P.8     | 23  | M   | TBI | NP; MVRI    | Femoral fracture                        | 11                      | Meropenem, Linezolid      | A4 V5 M6 O3 C2 Ar3 |
| P.9     | 21  | F   | TBI | NP; Blunt / | Blunt chest trauma (hemothorax)         | 16                      | Cefepime                  | A4 V5 M6 O3 C2 Ar3 |
| P.10    | 36  | M   | TBI | NP; MVRI    | Orthopedic fractures                    | 10                      | TZP, acid acetylsalicylic | A4 V5 M6 O3 C2 Ar3 |
| P.11    | 40  | M   | TBI | NP; MVRI    | Blunt chest trauma (ribs fractures)     | 11                      | AC                        | A4 V5 M6 O3 C2 Ar3 |
| P.12    | 70  | M   | TBI | NP; Blunt / | Blunt chest trauma (ribs fractures)     | 6                       | AC, Urapidil              | A3 V3 M4 O2 C2 Ar3 |
| P.13    | 79  | M   | TBI | NP; MVRI    | Complex pelvic and orthopedic fractures | 20                      | SA,                       | NA                 |
| P.14    | 22  | F   | TBI | MVRI        | Liver and splenic trauma                | 9                       | Ceftriaxone               | A4 V5 M6 O3 C2 Ar3 |
| P.15    | 32  | M   | TBI | MVRI        | Mesenteric trauma                       | 17                      | Propranolol               | A2 V2 M2 O1 C0 Ar2 |
| P.16    | 69  | M   | TBI | MVRI        | Femoral fracture                        | 16                      | Daptomycin,               | A1 V0 M2 O1 C0 Ar0 |
| P.17    | 21  | M   | TBI | MVRI        | Blunt chest trauma (hemothorax)         | 5                       | TZP, propranolol          | A4 V5 M6 O3 C2 Ar3 |

**Tab S2.** The CRS-R consists of 6 subscales: A= Auditory;V= Visual; M. Motor; O= Oromotor; C= Communication. Ar=Arousal Functions Abbreviations: AC= amoxicillin-clavulanate; BI= Brain Injury ; NP= Non penetrating; MVRI= Motor related vehicle injury ; SA= salicylic acid; TZP: Piperacillin-tazobactam.
